# Supplementary material for: TrpA1 Regulates Defecation of Food-Borne Pathogens under the Control of the Duox Pathway
Source: PubMed Central journal article supplement (PMC4699737; doi:10.1371/journal.pgen.1005773), 2016-01-04
Supplement: pgen.1005773.s001.pdf [file pgen.1005773.s001.pdf]

# Figure S1.

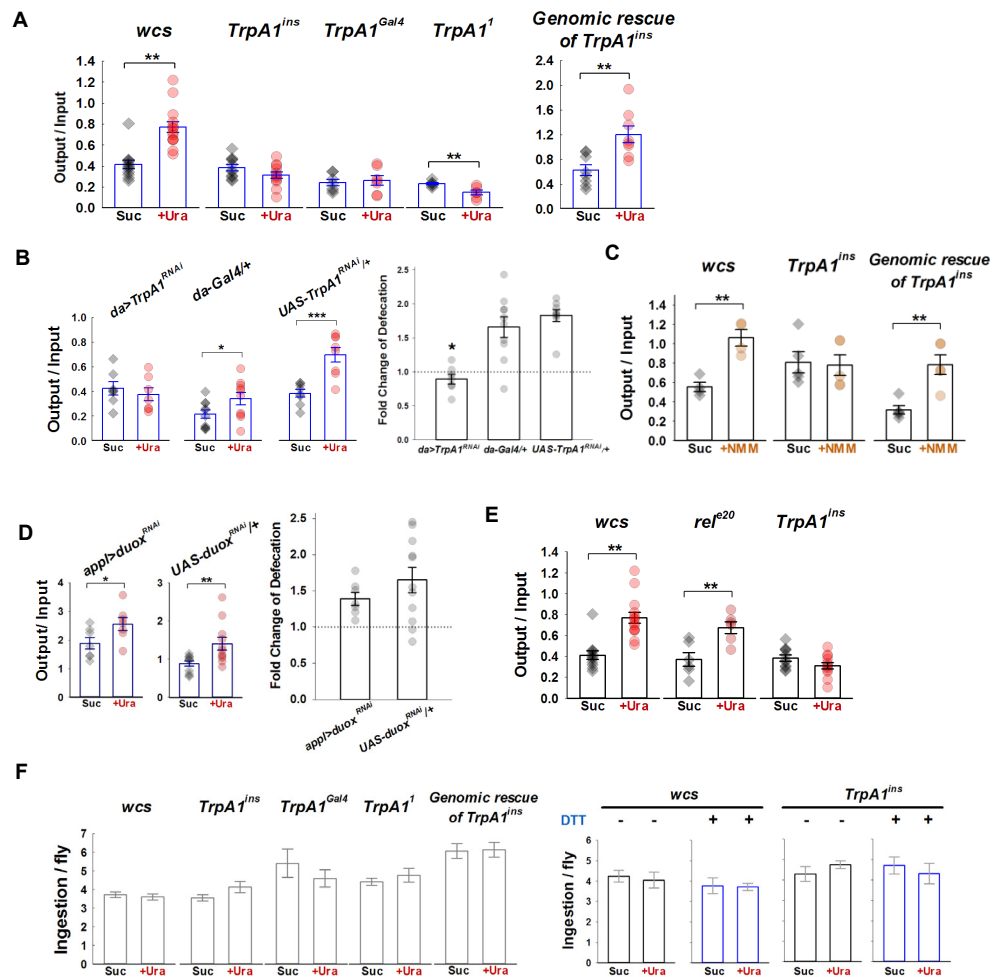

**Figure S1. *TrpA1* necessary for uracil-induced defecation is unrelated to the *imd* pathway and food ingestion.** (A-E) Defecation spot numbers normalized to ingestion amounts (indicated as output/input, spots/mm) are presented in addition to fold change of defecation results. The ingestion amount was assessed as the length change of food filling 5 microliter glass capillary tubes (15 mm/microliter). n=6-14 (A-E). (D) *Duox* RNAi knockdown by pan-neuronal *appl-Gal4* did not abolish uracil-dependent defecation (n=7-11). *Left*: The results presented as “Output/Input”, *Right*: fold change of defecation derived from the *Left* panel (n=6-14). (F) The ingestion amount per animal was analyzed across genotypes (n=6-18). Ingestion with uracil or DTT did not significantly alter the ingestion amounts. Only statistically significant comparisons were marked: \*, p<0.05, \*\*, p<0.01, \*\*\*, p<0.001. Student’s *t*-test or Tukey.
