# Supplementary material for: TrpA1 Regulates Defecation of Food-Borne Pathogens under the Control of the Duox Pathway
Source: PubMed Central journal article supplement (PMC4699737; doi:10.1371/journal.pgen.1005773), 2016-01-04
Supplement: pgen.1005773.s006.pdf [file pgen.1005773.s006.pdf]

# Figure S6

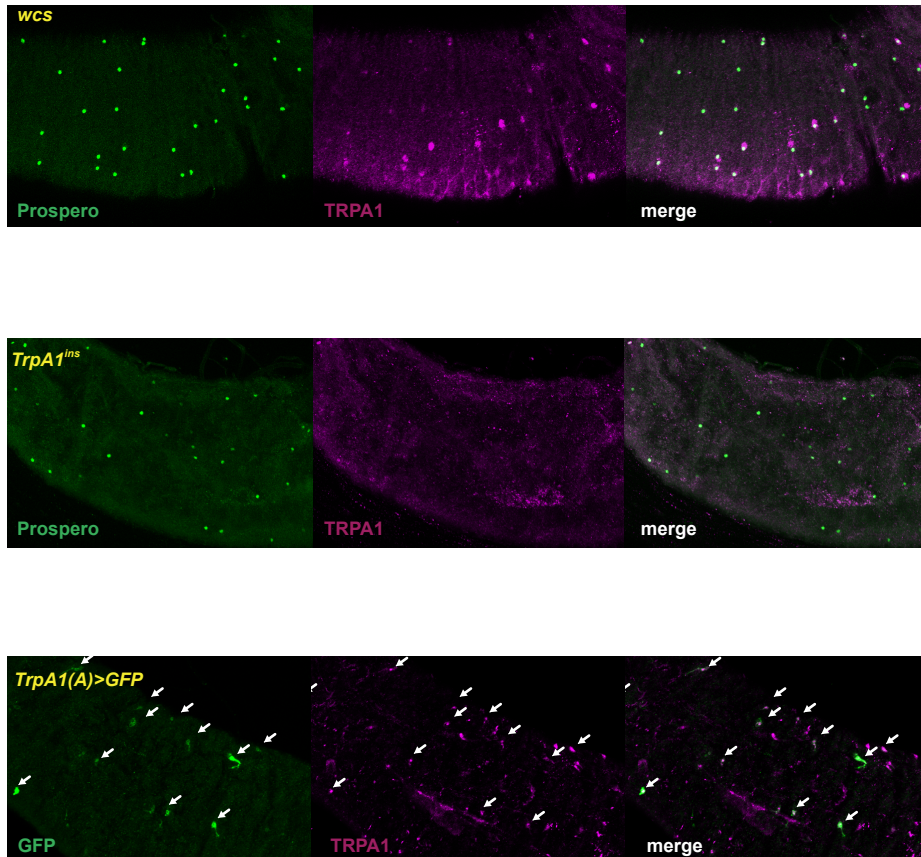

Figure S6. Higher magnification images of Figure 2A.
