# Supplementary material for: TrpA1 Regulates Defecation of Food-Borne Pathogens under the Control of the Duox Pathway
Source: PLOS journal article supplement (doi:10.1371/journal.pgen.1005773), 2016-01-04
Supplement: S10 (10.1371/journal.pgen.1005773.s010) [file journal.pgen.1005773.s010]

# Figure S10

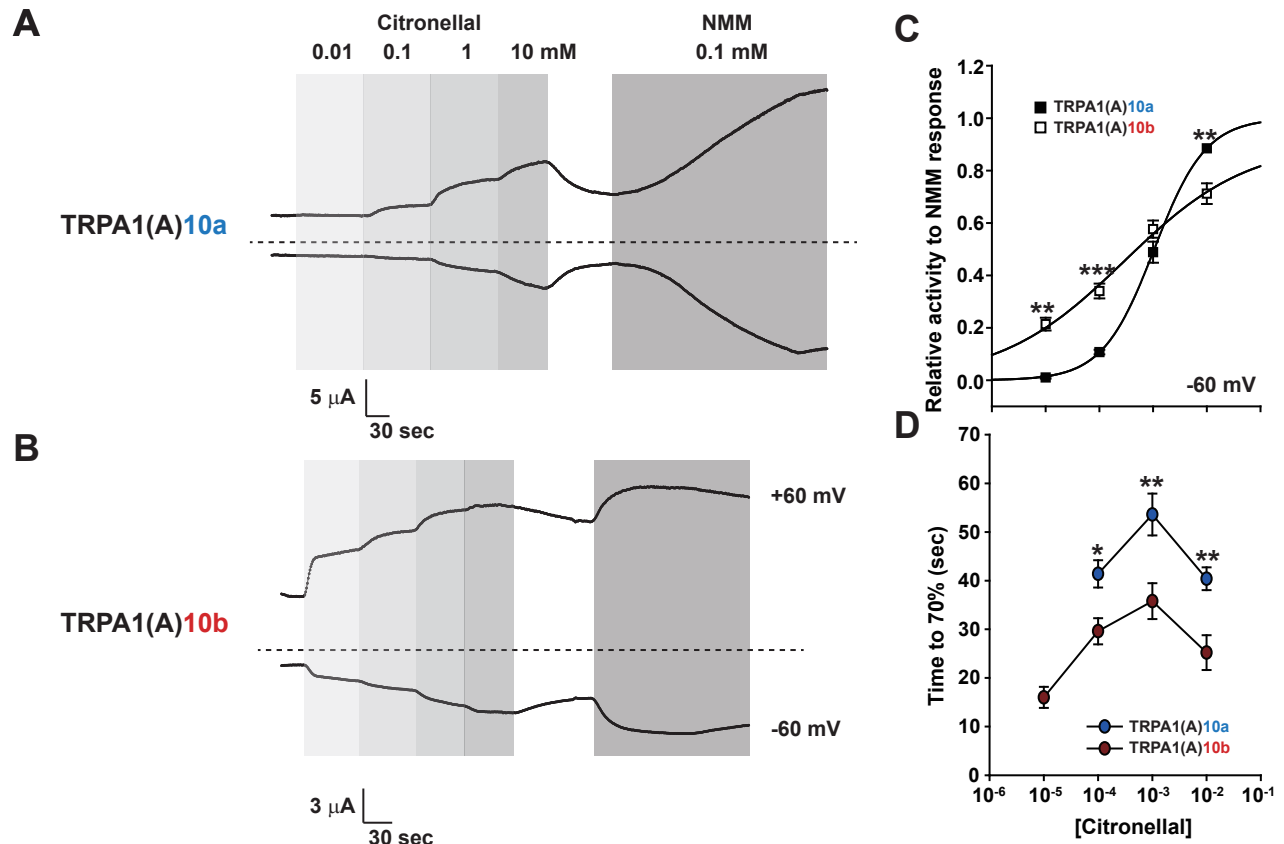

**Figure S10. TRPA1(A)10b responds fast and sensitively to citronellal compared to TRPA1(A)10a, when expressed in frog oocytes.** The non-covalent agonist citronellal opens TRPA1(A)10b faster and more sensitively than TRPA1(A)10a. Typical current recording with increasing concentrations of citronellal for TRPA1(A)10a (**A**) and TRPA1(A)10b (**B**). (**C**) Citronellal dose dependences of the two isoforms. (**D**) Time to 70% amplitude at each concentration was plotted as function of citronellal concentrations.
